# Supplementary material
Source: PubMed Central journal article supplement (PMC10505245)
Supplement: NIHMS1915526-supplement-1.pdf [file NIHMS1915526-supplement-1.pdf]

Supplementary table 1. Details of specific chemotherapy

| Code | Chemotherapy before sampling | 2p gain | 7p gain | intravenous chemotherapy before sampling | times | intra-arterial chemotherapy before sampling | times | intravitreal chemotherapy before sampling | times |
|------|------------------------------|---------|---------|------------------------------------------|-------|---------------------------------------------|-------|-------------------------------------------|-------|
| 1    | no                           | yes     | yes     | no                                       | 0     | no                                          | 0     | no                                        | 0     |
| 2    | yes                          | no      | no      | yes                                      | 1     | yes                                         | 1     | no                                        | 0     |
| 3    | no                           | yes     | no      | no                                       | 0     | no                                          | 0     | no                                        | 0     |
| 4    | no                           | yes     | no      | no                                       | 0     | no                                          | 0     | no                                        | 0     |
| 5    | yes                          | yes     | no      | yes                                      | 2     | yes                                         | 5     | yes                                       | 1     |
| 6    | yes                          | yes     | no      | yes                                      | 1     | no                                          | 0     | no                                        | 0     |
| 7    | no                           | yes     | no      | no                                       | 0     | no                                          | 0     | no                                        | 0     |
| 8    | yes                          | no      | no      | yes                                      | 8     | yes                                         | 1     | yes                                       | 4     |
| 9    | no                           | yes     | yes     | no                                       | 0     | no                                          | 0     | no                                        | 0     |
| 10   | no                           | yes     | yes     | no                                       | 0     | no                                          | 0     | no                                        | 0     |
| 11   | no                           | yes     | yes     | no                                       | 0     | no                                          | 0     | no                                        | 0     |
| 12   | no                           | yes     | no      | no                                       | 0     | no                                          | 0     | no                                        | 0     |
| 13   | no                           | yes     | yes     | no                                       | 0     | no                                          | 0     | no                                        | 0     |
| 14   | no                           | yes     | yes     | no                                       | 0     | no                                          | 0     | no                                        | 0     |
| 15   | yes                          | no      | no      | yes                                      | 1     | yes                                         | 1     | no                                        | 0     |
| 16   | yes                          | no      | no      | yes                                      | 6     | no                                          | 0     | yes                                       | 0     |
| 17   | yes                          | no      | no      | yes                                      | 4     | yes                                         | 3     | no                                        | 0     |
| 18   | yes                          | no      | no      | yes                                      | 1     | yes                                         | 2     | no                                        | 0     |
| 19   | yes                          | no      | yes     | yes                                      | 3     | yes                                         | 5     | no                                        | 0     |
| 20   | no                           | yes     | yes     | no                                       | 0     | no                                          | 0     | no                                        | 0     |
| 21   | yes                          | no      | no      | yes                                      | 1     | yes                                         | 5     | no                                        | 0     |
| 22   | yes                          | no      | no      | yes                                      | 1     | no                                          | 0     | no                                        | 0     |
| 23   | yes                          | no      | no      | yes                                      | 8     | yes                                         | 7     | no                                        | 0     |
| 24   | yes                          | yes     | no      | yes                                      | 3     | yes                                         | 3     | yes                                       | 3     |
| 25   | yes                          | no      | no      | yes                                      | 4     | yes                                         | 5     | yes                                       | 5     |
| 26   | no                           | yes     | yes     | no                                       | 0     | no                                          | 0     | no                                        | 0     |
| 27   | no                           | yes     | yes     | no                                       | 0     | no                                          | 0     | no                                        | 0     |
| 28   | yes                          | no      | no      | no                                       | 0     | yes                                         | 3     | yes                                       | 2     |
| 29   | no                           | no      | no      | no                                       | 0     | no                                          | 0     | no                                        | 0     |
| 30   | yes                          | yes     | no      | yes                                      | 1     | no                                          | 0     | no                                        | 0     |
| 31   | no                           | yes     | yes     | no                                       | 0     | no                                          | 0     | no                                        | 0     |
| 32   | yes                          | no      | no      | yes                                      | 6     | yes                                         | 4     | yes                                       | 1     |
| 33   | no                           | yes     | yes     | no                                       | 0     | no                                          | 0     | no                                        | 0     |
| 34   | yes                          | no      | no      | yes                                      | 1     | no                                          | 0     | no                                        | 0     |
| 35   | yes                          | no      | no      | yes                                      | 2     | yes                                         | 4     | yes                                       | 1     |
| 36   | yes                          | no      | yes     | yes                                      | 3     | yes                                         | 3     | no                                        | 0     |
| 37   | no                           | yes     | yes     | no                                       | 0     | no                                          | 0     | no                                        | 0     |
| 38   | no                           | yes     | no      | no                                       | 0     | no                                          | 0     | no                                        | 0     |
| 39   | yes                          | yes     | no      | no                                       | 0     | yes                                         | 2     | no                                        | 0     |

|    |     |     |     |     |   |     |   |     |    |
|----|-----|-----|-----|-----|---|-----|---|-----|----|
| 40 | yes | no  | yes | yes | 1 | no  | 0 | no  | 0  |
| 41 | no  | yes | yes | no  | 0 | no  | 0 | no  | 0  |
| 42 | no  | no  | no  | no  | 0 | no  | 0 | no  | 0  |
| 43 | yes | yes | no  | yes | 6 | no  | 0 | yes | 1  |
| 44 | yes | yes | no  | yes | 6 | yes | 1 | yes | 1  |
| 45 | yes | yes | no  | yes | 6 | yes | 6 | yes | 4  |
| 46 | yes | no  | no  | yes | 6 | yes | 7 | yes | 10 |
| 47 | yes | no  | no  | yes | 9 | no  | 0 | no  | 0  |
| 48 | yes | yes | yes | no  | 0 | yes | 1 | no  | 0  |
| 49 | no  | no  | no  | no  | 0 | no  | 0 | no  | 0  |
| 50 | yes | no  | no  | yes | 2 | yes | 3 | no  | 0  |
| 51 | yes | yes | yes | yes | 6 | no  | 0 | no  | 0  |
| 52 | yes | no  | yes | yes | 4 | no  | 0 | no  | 0  |
| 53 | yes | yes | no  | yes | 8 | no  | 0 | yes | 1  |
| 54 | no  | no  | yes | no  | 0 | no  | 0 | no  | 0  |
| 55 | yes | no  | no  | yes | 1 | no  | 0 | no  | 0  |
| 56 | no  | no  | no  | no  | 0 | no  | 0 | no  | 0  |
| 57 | yes | no  | no  | no  | 0 | yes | 4 | yes | 1  |
| 58 | yes | no  | no  | yes | 4 | yes | 3 | no  | 0  |

Supplementary Table 2. Association of chemotherapy and recurrent SCNVs

|               | Candidate genes        | Total N=58 (%) | Sample collected after primary enucleation N=23(%) | Sample collected after chemotherapy N=35(%) | P Value          |
|---------------|------------------------|----------------|----------------------------------------------------|---------------------------------------------|------------------|
| 1q32 gain     | MDM4, KIF14            | 51(87)         | 21(91)                                             | 30(86)                                      | 0.692            |
| 2p24 gain     | MYCN <sup>+</sup>      | 29(50)         | 18(78)                                             | 11(31)                                      | <b>0.001</b> *** |
| 6p22 gain     | DEK, E2F3              | 44(76)         | 16(70)                                             | 28(80)                                      | 0.532            |
| 7q31-34 gain  | MET, BRAF <sup>+</sup> | 20(35)         | 14(61)                                             | 6(17)                                       | <b>0.001</b> *** |
| 11q22-24 loss | ATM <sup>#</sup>       | 11(19)         | 2(9)                                               | 9(26)                                       | 0.172            |
| 13q31-34gain  | C13orf25 (MIR17HG)     | 22(38)         | 12(52)                                             | 10(29)                                      | 0.098            |
| 13q14-22loss  | RB1 <sup>#</sup>       | 4(7)           | 2(9)                                               | 2(6)                                        | 1.000            |
| 16q22-24 loss | CDH11, RBL2            | 40(69)         | 19(83)                                             | 21(60)                                      | 0.087            |
| 17q21-25 gain | CDK3                   | 31(53)         | 13(57)                                             | 18(51)                                      | 0.791            |
| 19q12-13 loss | AKT2                   | 25(43)         | 11(48)                                             | 14(40)                                      | 0.597            |

\*P < 0.05, \*\*P < 0.01, \*\*\*P < 0.001. <sup>+</sup>: reported oncogene #: reported tumor suppressor

Supplementary Table 3. Comparison of SCNA between primary and secondary enucleated eyes

|               | Total<br>N=41 ( % ) | Primary<br>enucleated<br>eyes<br>N=24 (%) | Secondary<br>enucleated<br>eyes<br>N=17(%) | P Value       |
|---------------|---------------------|-------------------------------------------|--------------------------------------------|---------------|
| 1q32 gain     | 35 ( 85 )           | 22 ( 92 )                                 | 13 ( 76 )                                  | 0.212         |
| 2p24 gain     | 24 ( 38 )           | 18 ( 75 )                                 | 6 ( 35 )                                   | <b>0.023*</b> |
| 6p13-24 gain  | 30 ( 73 )           | 16 ( 67 )                                 | 14 ( 82 )                                  | 0.309         |
| 7q31-34 gain  | 17 ( 42 )           | 14 ( 58 )                                 | 3 ( 18 )                                   | <b>0.012*</b> |
| 11q22-24 loss | 6 ( 15 )            | 2 ( 8 )                                   | 4 ( 24 )                                   | 0.212         |
| 13q31-34gain  | 16 ( 39 )           | 12 ( 50 )                                 | 4 ( 24 )                                   | 0.113         |
| 13q14-22loss  | 3 ( 7 )             | 2 ( 8 )                                   | 1 ( 6 )                                    | 1.000         |
| 16q22-24 loss | 29 ( 71 )           | 19 ( 79 )                                 | 10 ( 59 )                                  | 0.184         |
| 17q21-25 gain | 25 ( 61 )           | 13 ( 54 )                                 | 12 ( 71 )                                  | 0.344         |
| 19q12-13 loss | 20 ( 49 )           | 11 ( 46 )                                 | 9 ( 53 )                                   | 0.756         |

\*: \*statistically significant

Supplementary Table 4. 2p gain and 7q gain in different treatment groups

| Total N=58                |   | 2p gain |    |                | 7q gain |    |                |
|---------------------------|---|---------|----|----------------|---------|----|----------------|
| Previous chemotherapy     |   | -       | +  | P value        | -       | +  | P value        |
| IVC                       | - | 7       | 20 | <b>0.001**</b> | 12      | 15 | <b>0.002**</b> |
|                           | + | 22      | 9  |                | 26      | 5  |                |
| IAC                       | - | 12      | 23 | <b>0.007**</b> | 18      | 17 | <b>0.010*</b>  |
|                           | + | 17      | 6  |                | 20      | 3  |                |
| Intravitreal chemotherapy | - | 21      | 23 | 0.760          | 24      | 20 | <b>0.001**</b> |
|                           | + | 8       | 6  |                | 14      | 0  |                |

\*P &lt; 0.05, \*\*P &lt; 0.01, \*\*\*P &lt; 0.001

Supplementary Table 5. Logistics regression analysis of pathological high-risk factors on recurrent copy number variations

|               | Total<br>N=41<br>N (%) | Massive<br>choroid<br>invasion (+)<br>N=12<br>N (%) | Massive<br>choroid<br>invasion (-)<br>N=29<br>N (%) | OR<br>(95%<br>CI)           | P<br>Value | post-laminar<br>ON invasion<br>(+)<br>N=14<br>N(%) | post-laminar<br>ON invasion<br>(+)<br>N=27<br>N(%) | OR<br>(95%<br>CI)           | P<br>Value | Choroid and<br>ON invasion<br>(+)<br>N=18<br>N(%) | Choroid and<br>ON invasion<br>(-)<br>N=23<br>N(%) | OR<br>(95%<br>CI) | P Value |
|---------------|------------------------|-----------------------------------------------------|-----------------------------------------------------|-----------------------------|------------|----------------------------------------------------|----------------------------------------------------|-----------------------------|------------|---------------------------------------------------|---------------------------------------------------|-------------------|---------|
| 1q32 gain     | 35(85)                 | 11(92)                                              | 24(83)                                              | /                           | 0.473      | 12(86)                                             | 23(85)                                             | /                           | 0.964      | 14(78)                                            | 21(91)                                            | /                 | 0.239   |
| 2p24 gain     | 24(59)                 | 6(50)                                               | 18(62)                                              | /                           | 0.477      | 9(64)                                              | 15(56)                                             | /                           | 0.591      | 9(50)                                             | 15(65)                                            | /                 | 0.732   |
| 6p13-24 gain  | 30(73)                 | 9(75)                                               | 21(72)                                              | /                           | 0.865      | 11(79)                                             | 19(70)                                             | /                           | 0.576      | 11(61)                                            | 19(83)                                            | /                 | 0.903   |
| 7q31-34 gain  | 17(41)                 | 3(25)                                               | 14(48)                                              | /                           | 0.357      | 5(36)                                              | 12(44)                                             | /                           | 0.591      | 5(28)                                             | 12(52)                                            | /                 | 0.767   |
| 11q22-24 loss | 6(15)                  | 2(17)                                               | 4(14)                                               | /                           | 0.813      | 3(21)                                              | 3(11)                                              | /                           | 0.383      | 3(17)                                             | 3(13)                                             | /                 | 0.745   |
| 13q31-34gain  | 16(39)                 | 2(17)                                               | 14(48)                                              | /                           | 0.073      | 7(50)                                              | 9(33)                                              | /                           | 0.303      | 7(39)                                             | 9(39)                                             | /                 | 0.510   |
| 13q14-22loss  | 3(7)                   | 0(0)                                                | 3(10)                                               | /                           | 0.999      | 1(7)                                               | 2(7)                                               | /                           | 0.975      | 1(5)                                              | 2(9)                                              | /                 | 0.704   |
| 16q22-24 loss | 29(71)                 | 11(92)                                              | 18(62)                                              | /                           | 0.087      | 11(79)                                             | 18(67)                                             | /                           | 0.430      | 11(61)                                            | 18(78)                                            | /                 | 0.126   |
| 17q21-25 gain | 25(61)                 | 8(67)                                               | 17(57)                                              | /                           | 0.632      | 9(64)                                              | 16(59)                                             | /                           | 0.755      | 9(50)                                             | 16(70)                                            | /                 | 0.510   |
| 19q12-13 loss | 20(49)                 | 9(75)                                               | 11(38)                                              | 4.909<br>(1.088-<br>22.148) | 0.038<br>* | 10(71)                                             | 10(4)                                              | 4.250<br>(1.050-<br>17.202) | 0.043*     | 10(56)                                            | 10(43)                                            | /                 | 0.166   |

\*P&lt;0.05
